# Supplementary material for: MODISTools – downloading and processing MODIS remotely sensed data in R
Source: PubMed Central journal article supplement (PMC4278818; doi:10.1002/ece3.1273), 2014-12-02

Figure SA7. Response of species richness to EVI at the 6.25x6.25 km scale using spatially-weighted and unweighted data

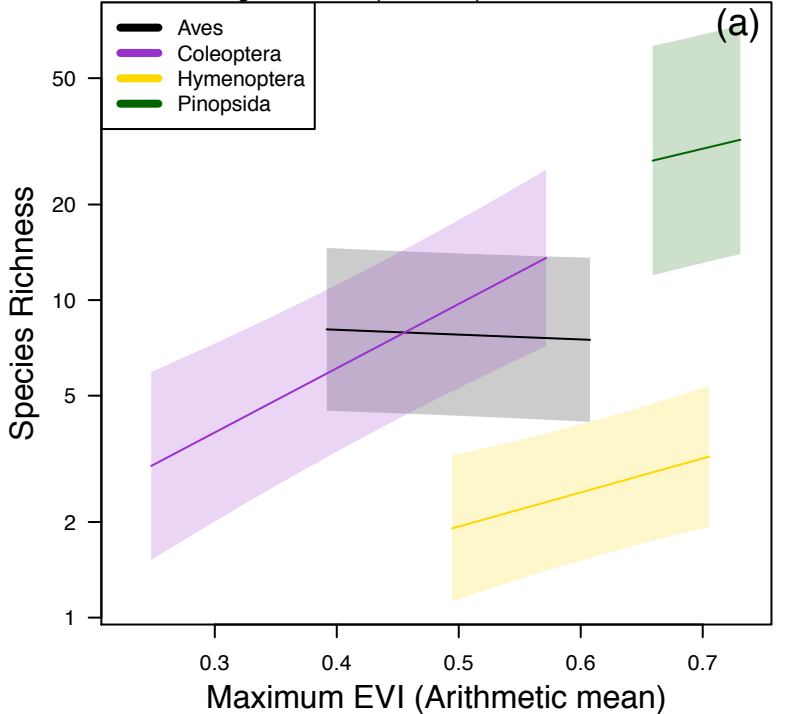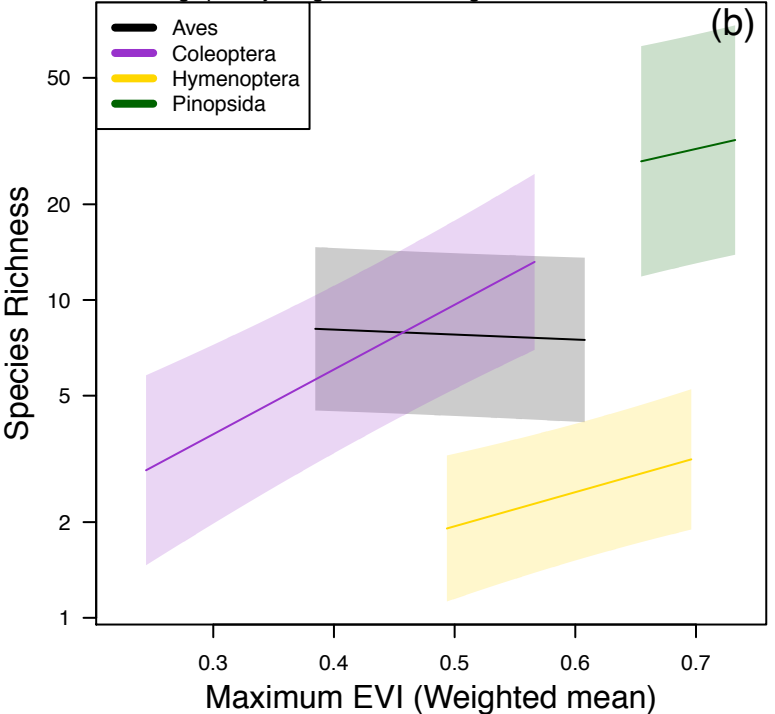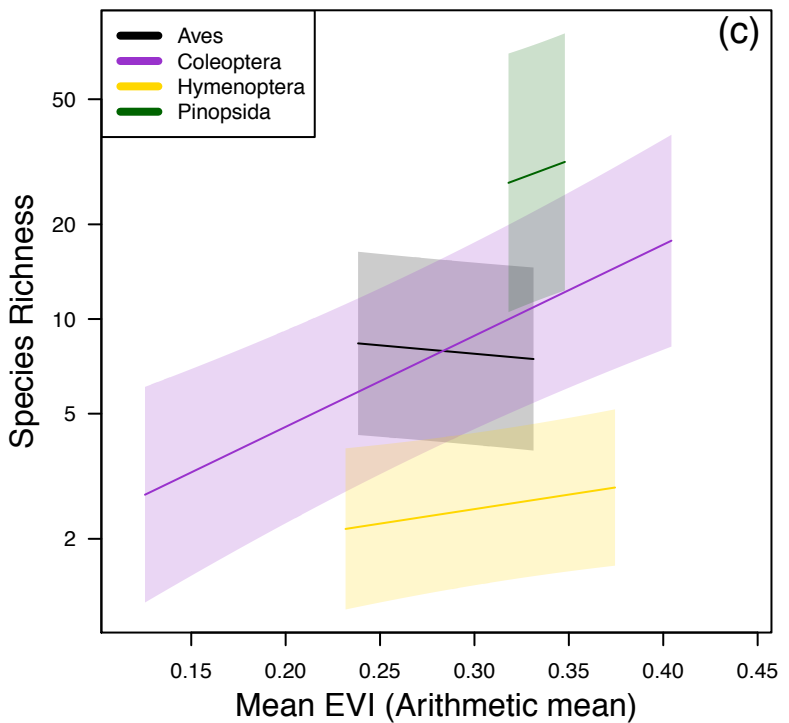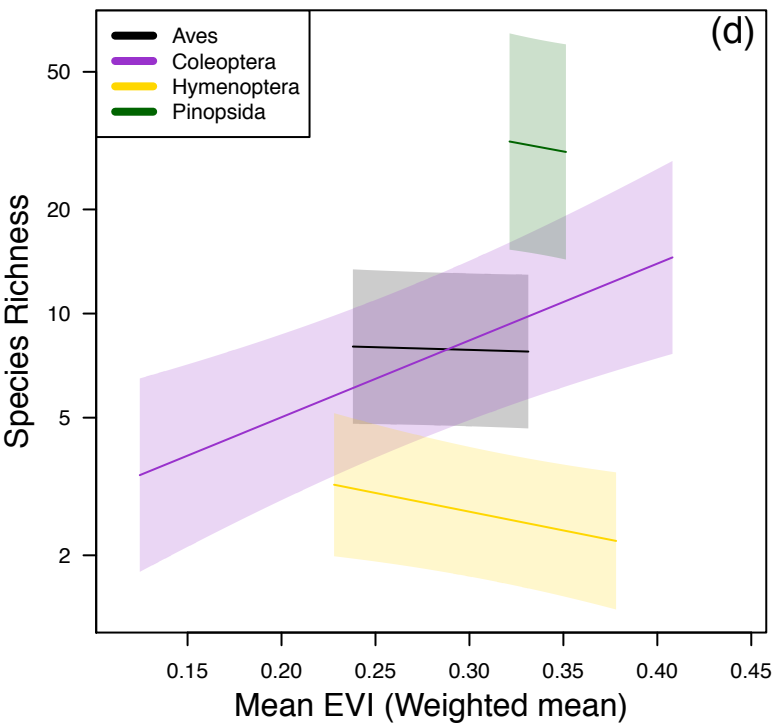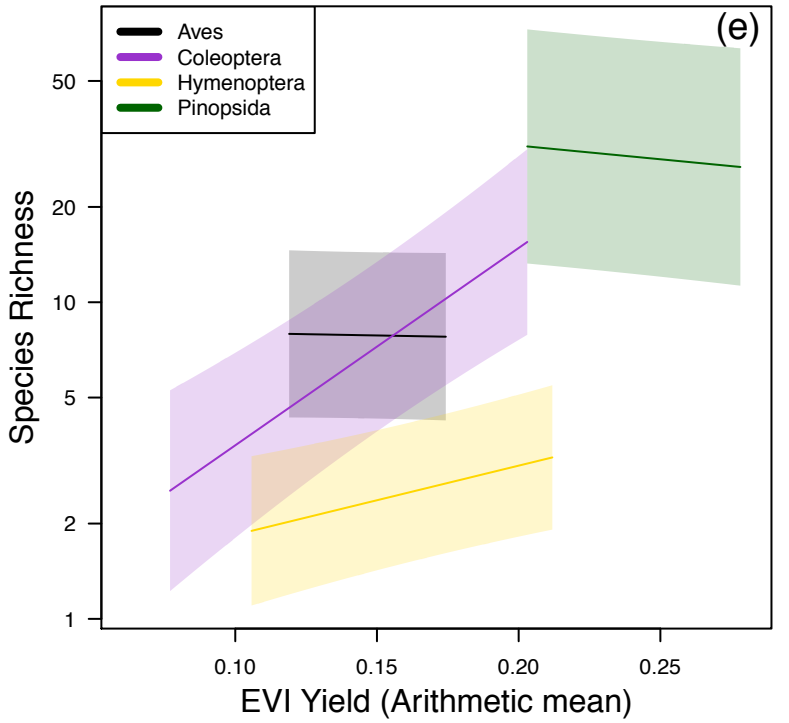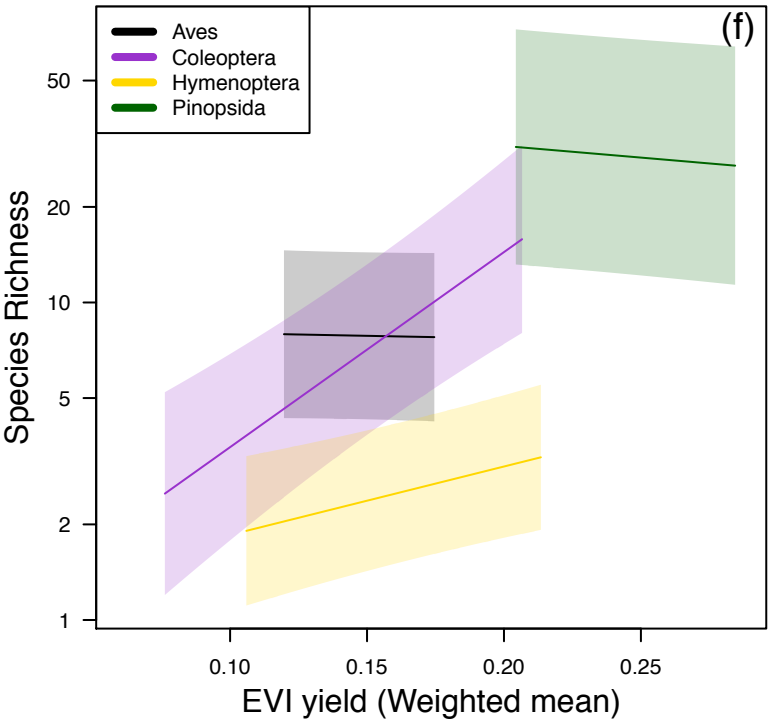

Supplement: ece30004-4658-sd7.pdf [file ece30004-4658-sd7.pdf]
